# Supplementary material
Source: PubMed Central journal article supplement (PMC8757565)

**Disclosure Purpose:** 21-19641

**Summary of Interests**

I do not have any interests to disclose at this time.

**Additional Questions:**

- 1. **Are there other relationships or activities that readers could perceive to have influenced, or that give the appearance of potentially influencing, what you wrote in the submitted work?**  
No.
- 2. **What is the manuscript title?**  
Plasma Neutralization Properties of the SARS-CoV-2 Omicron Variant
- 3. **Are you the corresponding author?**  
No.

**Certification**

I certify that the information provided in this disclosure is complete and accurate.

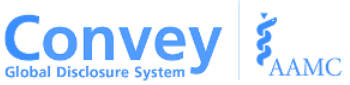

Disclosure Purpose: 21-19641

Summary of Interests

**Company or Organization**

| Entity                                                                            | Type       | Interest Held By                                            |
|-----------------------------------------------------------------------------------|------------|-------------------------------------------------------------|
| Pfizer                                                                            | Consultant | Self                                                        |
| <i>Category:</i> Consultant<br><i>Additional Information:</i> 3 hours, \$400/hour |            | <i>Description:</i> Occasional consulting on COVID vaccines |

Additional Questions:

- Are there other relationships or activities that readers could perceive to have influenced, or that give the appearance of potentially influencing, what you wrote in the submitted work?**  
No.
- What is the manuscript title?**  
Plasma neutralization properties of the SARS-CoV-2 Omicron variant
- Are you the corresponding author?**  
Yes.
  - Please list the other authors' names here.**  
Fabian Schmidt, Frauke Muecksch, Yiska Weisblum, Justin Da Silva, Eva Bednarski, Alice Cho, Zijun Wang, Christian Gaebler, Marina Caskey, Michel C. Nussenzweig, Theodora Hatzioannou

Certification

I certify that the information provided in this disclosure is complete and accurate.

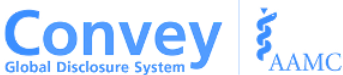

**Disclosure Purpose:** 21-19641

### Summary of Interests

I do not have any interests to disclose at this time.

### Additional Questions:

- Are there other relationships or activities that readers could perceive to have influenced, or that give the appearance of potentially influencing, what you wrote in the submitted work?**  
No.
- What is the manuscript title?**  
Plasma Neutralization Properties of the SARS-CoV-2 Omicron Variant
- Are you the corresponding author?**  
No.

### Certification

I certify that the information provided in this disclosure is complete and accurate.

**Disclosure Purpose:** 21-19641

**Summary of Interests**

I do not have any interests to disclose at this time.

**Additional Questions:**

- Are there other relationships or activities that readers could perceive to have influenced, or that give the appearance of potentially influencing, what you wrote in the submitted work?**  
No.
- What is the manuscript title?**  
Plasma Neutralization Properties of the SARS-CoV-2 Omicron Variant
- Are you the corresponding author?**  
No.

**Certification**

I certify that the information provided in this disclosure is complete and accurate.

**Disclosure Purpose:** 21-19641

**Summary of Interests**

I do not have any interests to disclose at this time.

**Additional Questions:**

- Are there other relationships or activities that readers could perceive to have influenced, or that give the appearance of potentially influencing, what you wrote in the submitted work?**  
No.
- What is the manuscript title?**  
Plasma Neutralization Properties of the SARS-CoV-2 Omicron Variant
- Are you the corresponding author?**  
No.

**Certification**

I certify that the information provided in this disclosure is complete and accurate.



**Disclosure Purpose:** 21-19641

**Summary of Interests**

I do not have any interests to disclose at this time.

**Additional Questions:**

- 1. **Are there other relationships or activities that readers could perceive to have influenced, or that give the appearance of potentially influencing, what you wrote in the submitted work?**  
No.
- 2. **What is the manuscript title?**  
Plasma Neutralization Properties of the SARS-CoV-2 Omicron Variant
- 3. **Are you the corresponding author?**  
No.

**Certification**

I certify that the information provided in this disclosure is complete and accurate.

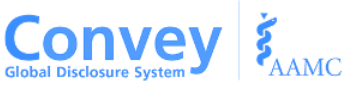

**Disclosure Purpose:** 21-19641

### Summary of Interests

I do not have any interests to disclose at this time.

### Additional Questions:

- Are there other relationships or activities that readers could perceive to have influenced, or that give the appearance of potentially influencing, what you wrote in the submitted work?**  
No.
- What is the manuscript title?**  
Plasma neutralization properties of the SARS-CoV-2 Omicron Variant
- Are you the corresponding author?**  
No.

### Certification

I certify that the information provided in this disclosure is complete and accurate.

**Disclosure Purpose:** 21-19641

### Summary of Interests

I do not have any interests to disclose at this time.

### Additional Questions:

- Are there other relationships or activities that readers could perceive to have influenced, or that give the appearance of potentially influencing, what you wrote in the submitted work?**  
No.
- What is the manuscript title?**  
Plasma neutralization properties of the SARS-CoV-2 Omicron variant
- Are you the corresponding author?**  
No.

### Certification

I certify that the information provided in this disclosure is complete and accurate.



Disclosure Purpose: 21-19641

## Summary of Interests

### Company or Organization

| Entity                                                   | Type  | Interest Held By                              |
|----------------------------------------------------------|-------|-----------------------------------------------|
| <a href="#">Celldex Therapeutics</a>                     | Other | Self                                          |
| <i>Category:</i> Other<br><i>Additional Information:</i> |       | <i>Description:</i> Scientific Advisory Board |
| <a href="#">Frontier Biotechnologies</a>                 | Other | Self                                          |
| <i>Category:</i> Other<br><i>Additional Information:</i> |       | <i>Description:</i> Scientific Advisory Board |
| <a href="#">Walking Fish Therapeutics</a>                | Other | Self                                          |
| <i>Category:</i> Other<br><i>Additional Information:</i> |       | <i>Description:</i> Scientific Advisory Board |

### Intellectual Property

| Type                                                                                                                                                                                                                              | Is Licensed                                        | Interest Held By                                                                                                       |      |                 |                                                    |  |  |  |
|-----------------------------------------------------------------------------------------------------------------------------------------------------------------------------------------------------------------------------------|----------------------------------------------------|------------------------------------------------------------------------------------------------------------------------|------|-----------------|----------------------------------------------------|--|--|--|
| <a href="#">Other Intellectual Property - Royalties for HIV antibodies</a>                                                                                                                                                        | Yes                                                | Self                                                                                                                   |      |                 |                                                    |  |  |  |
| <i>Description:</i> Royalties for HIV antibodies<br><i>Licensees:</i>                                                                                                                                                             |                                                    | <i>Type:</i><br><i>Additional Information:</i>                                                                         |      |                 |                                                    |  |  |  |
| <table border="1"> <thead> <tr> <th>Licensee</th> <th>Title</th> <th>Date</th> </tr> </thead> <tbody> <tr> <td>Gilead Sciences</td> <td>Human Immunodeficiency Virus Neutralizing Antibodi</td> <td></td> </tr> </tbody> </table> | Licensee                                           | Title                                                                                                                  | Date | Gilead Sciences | Human Immunodeficiency Virus Neutralizing Antibodi |  |  |  |
| Licensee                                                                                                                                                                                                                          | Title                                              | Date                                                                                                                   |      |                 |                                                    |  |  |  |
| Gilead Sciences                                                                                                                                                                                                                   | Human Immunodeficiency Virus Neutralizing Antibodi |                                                                                                                        |      |                 |                                                    |  |  |  |
| <a href="#">Patent - Neutralizing anti-SARS-CoV2 antibodies and metho ...</a>                                                                                                                                                     | No                                                 | Self                                                                                                                   |      |                 |                                                    |  |  |  |
| <i>Description:</i> Neutralizing anti-SARS-CoV2 antibodies and methods of use thereof<br><i>Patent Status:</i> Pending<br><i>Filing Jurisdiction:</i><br><i>Licensees:</i>                                                        |                                                    | <i>Patent Number:</i> PCT/US2021/070472<br><i>Patent Holder:</i><br><i>Additional Information:</i>                     |      |                 |                                                    |  |  |  |
| <a href="#">Patent - Broadly-Neutralizing Anti-HIV Antibodies</a>                                                                                                                                                                 | No                                                 | Self                                                                                                                   |      |                 |                                                    |  |  |  |
| <i>Description:</i> Broadly-Neutralizing Anti-HIV Antibodies<br><i>Patent Status:</i> Pending<br><i>Filing Jurisdiction:</i><br><i>Licensees:</i>                                                                                 |                                                    | <i>Patent Number:</i> US2013/065696<br><i>Patent Holder:</i> Current Institution<br><i>Additional Information:</i>     |      |                 |                                                    |  |  |  |
| <a href="#">Patent - Human Immunodeficiency Virus Neutralizing Antibo ...</a>                                                                                                                                                     | No                                                 | Self                                                                                                                   |      |                 |                                                    |  |  |  |
| <i>Description:</i> Human Immunodeficiency Virus Neutralizing Antibodies and Methods of Use Thereof<br><i>Patent Status:</i> Pending<br><i>Filing Jurisdiction:</i> USA<br><i>Licensees:</i>                                      |                                                    | <i>Patent Number:</i> PCT/US2012/038400<br><i>Patent Holder:</i> Current Institution<br><i>Additional Information:</i> |      |                 |                                                    |  |  |  |

### Additional Questions:

- Are there other relationships or activities that readers could perceive to have influenced, or that give the appearance of potentially influencing, what you wrote in the submitted work?  
No.
- What is the manuscript title?  
Plasma neutralization properties of the SARS-CoV-2 Omicron variant
- Are you the corresponding author?  
No.

Certification

I certify that the information provided in this disclosure is complete and accurate.

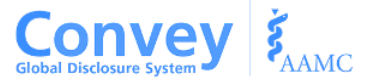

**Disclosure Purpose:** 21-19641

**Summary of Interests**

I do not have any interests to disclose at this time.

**Additional Questions:**

- 1. **Are there other relationships or activities that readers could perceive to have influenced, or that give the appearance of potentially influencing, what you wrote in the submitted work?**  
No.
- 2. **What is the manuscript title?**  
Plasma Neutralization Properties of the SARS-CoV-2 Omicron Variant
- 3. **Are you the corresponding author?**  
No.

**Certification**

I certify that the information provided in this disclosure is complete and accurate.



**Disclosure Purpose:** 21-19641

**Summary of Interests**

I do not have any interests to disclose at this time.

**Additional Questions:**

- 1. **Are there other relationships or activities that readers could perceive to have influenced, or that give the appearance of potentially influencing, what you wrote in the submitted work?**  
No.
- 2. **What is the manuscript title?**  
Plasma Neutralization Properties of the SARS-CoV-2 Omicron Variant
- 3. **Are you the corresponding author?**  
No.

**Certification**

I certify that the information provided in this disclosure is complete and accurate.

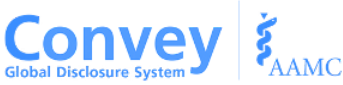

Disclosure Purpose: 21-19641

Summary of Interests

I do not have any interests to disclose at this time.

Additional Questions:

- 1. **Are there other relationships or activities that readers could perceive to have influenced, or that give the appearance of potentially influencing, what you wrote in the submitted work?**  
No.
- 2. **What is the manuscript title?**  
Plasma Neutralization Properties of the SARS-CoV-2 Omicron Variant
- 3. **Are you the corresponding author?**  
No.

Certification

I certify that the information provided in this disclosure is complete and accurate.



Supplement: NEJMc2119641_disclosures.pdf [file NEJMc2119641_disclosures.pdf]
